# Supplementary material for: Hydrogen peroxide is a neuronal alarmin that triggers specific RNAs, local translation of Annexin A2, and cytoskeletal remodeling in Schwann cells
Source: PubMed Central journal article supplement (PMC6004060; doi:10.1261/rna.064816.117), 2018-07

# Clements et al, 2017

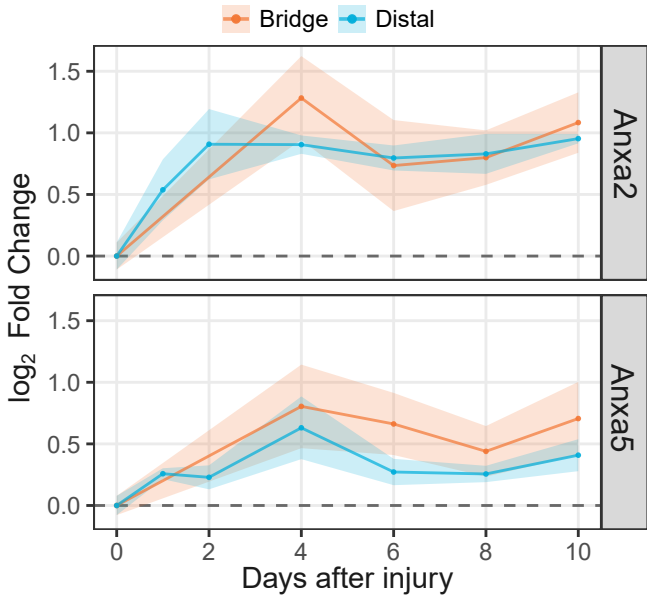

Supplement: supp_064816.117_Supplemental_Figure_S4.pdf [file supp_064816.117_Supplemental_Figure_S4.pdf]
